# Supplementary material for: Insight into Different Stages of Steroid Degradation in Thermophilic Saccharopolyspora hirsuta VKM Ac-666T Strain
Source: MDPI journal article supplement (doi:10.3390/ijms232416174), 2022-12-18
Supplement: s1 [file s1]

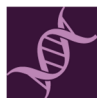

## Supplementary Materials

# Insight into Different Stages of Steroid Degradation in Thermophilic *Saccharopolyspora hirsuta* VKM Ac-666<sup>T</sup> Strain

Tatyana Lobastova <sup>1</sup>, Victoria Fokina <sup>1,\*</sup>, Irina Pozdnyakova-Filatova <sup>2</sup>, Sergey Tarlachkov <sup>1</sup> and Marina Donova <sup>1</sup>

<sup>1</sup> Laboratory of Bioengineering of Microbial Producers, G.K. Skryabin Institute of Biochemistry and Physiology of Microorganisms, RAS, Federal Research Center "Pushchino Scientific Center for Biological Research of the Russian Academy of Sciences", Pushchino 142290, Russia

<sup>2</sup> Laboratory of Molecular Microbiology, G.K. Skryabin Institute of Biochemistry and Physiology of Microorganisms, RAS, Federal Research Center "Pushchino Scientific Center for Biological Research of the Russian Academy of Sciences", Pushchino 142290, Russia

\* Correspondence: 2vvfokina@gmail.com

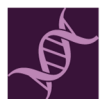

**Supplementary Table S1.** Changes in the level of sterol catabolism genes in the *S. hirsuta* genome during transcriptomic profiling in response to cholesterol.

| No.                           | Scaffold acc.  | Locus tag          | Protein acc. | Name/Function          | fold Change | padj     |
|-------------------------------|----------------|--------------------|--------------|------------------------|-------------|----------|
| Mce4 transport system         |                |                    |              |                        |             |          |
| 1.                            | VWPH01000020.1 | <i>F1721_32550</i> | KAA5825886.1 | <i>mce4F</i>           | 0.82        | 1.00E+00 |
| 2.                            | VWPH01000020.1 | <i>F1721_32555</i> | KAA5825887.1 | <i>mce4E</i>           | 1.22        | 1.00E+00 |
| 3.                            | VWPH01000020.1 | <i>F1721_32560</i> | KAA5825888.1 | <i>mce4D</i>           | 0.97        | 1.00E+00 |
| 4.                            | VWPH01000020.1 | <i>F1721_32565</i> | KAA5825937.1 | <i>mce4C</i>           | 0.87        | 1.00E+00 |
| 5.                            | VWPH01000020.1 | <i>F1721_32570</i> | KAA5825889.1 | <i>mce4B</i>           | 1.00        | 1.00E+00 |
| 6.                            | VWPH01000020.1 | <i>F1721_32575</i> | KAA5825890.1 | <i>mce4A</i>           | 1.00        | 1.00E+00 |
| 7.                            | VWPH01000020.1 | <i>F1721_32580</i> | KAA5825891.1 | <i>yrbEb</i>           | 0.91        | 1.00E+00 |
| 8.                            | VWPH01000020.1 | <i>F1721_32585</i> | KAA5825892.1 | <i>yrbEa</i>           | 1.38        | 1.00E+00 |
| Sterol side chain degradation |                |                    |              |                        |             |          |
| 9.                            | VWPH01000020.1 | <i>F1721_32590</i> | KAA5825893.1 | <i>fabG3</i>           | 1.56        | 1.00E+00 |
| 10.                           | VWPH01000020.1 | <i>F1721_32595</i> | KAA5825894.1 | aldehyde dehydrogenase | 1.30        | 1.00E+00 |
| 11.                           | VWPH01000020.1 | <i>F1721_32600</i> | KAA5825895.1 | <i>hsd4A</i>           | 1.7         | 1.00E+00 |

|     |                |             |              |                                            |      |          |
|-----|----------------|-------------|--------------|--------------------------------------------|------|----------|
| 12. | VWPH01000020.1 | F1721_32605 | KAA5825896.1 | <i>fadE26</i>                              | 0.92 | 1.00E+00 |
| 13. | VWPH01000020.1 | F1721_32610 | KAA5825897.1 | <i>fadE27</i>                              | 0.59 | 1.00E+00 |
| 14. | VWPH01000020.1 | F1721_32615 | KAA5825898.1 | <i>fadD17</i>                              | 1.08 | 1.00E+00 |
| 15. | VWPH01000020.1 | F1721_32620 | KAA5825899.1 | alpha/beta hydrolase                       | 0.89 | 1.00E+00 |
| 16. | VWPH01000020.1 | F1721_32625 | KAA5825900.1 | MerR family<br>transcriptional regulator   | 0.89 | 1.00E+00 |
| 17. | VWPH01000020.1 | F1721_32630 | KAA5825901.1 | nitronate monooxygenase                    | 1.27 | 1.00E+00 |
| 18. | VWPH01000020.1 | F1721_32635 | KAA5825902.1 | <i>fadD19</i>                              | 1.75 | 1.00E+00 |
| 19. | VWPH01000020.1 | F1721_32640 | KAA5825903.1 | <i>echA19</i>                              | 2.16 | 1.00E+00 |
| 20. | VWPH01000020.1 | F1721_32645 | KAA5825904.1 | acyl-CoA synthetase                        | 1.15 | 1.00E+00 |
| 21. | VWPH01000020.1 | F1721_32650 | KAA5825905.1 | LLM class F420-dependent<br>oxidoreductase | 0.80 | 1.00E+00 |
| 22. | VWPH01000020.1 | F1721_32655 | KAA5825906.1 | DNA-binding protein                        | 1.93 | 7.88E-01 |
| 23. | VWPH01000020.1 | F1721_32660 | KAA5825907.1 | <i>ltp4</i>                                | 1.41 | 1.00E+00 |
| 24. | VWPH01000020.1 | F1721_32665 | KAA5825908.1 | <i>ltp3</i>                                | 1.38 | 1.00E+00 |
| 25. | VWPH01000020.1 | F1721_32670 | KAA5825909.1 | F420-dependent LLM class<br>oxidoreductase | 1.18 | 1.00E+00 |
| 26. | VWPH01000020.1 | F1721_32675 | KAA5825910.1 | <i>ksdI</i>                                | 1.82 | 1.00E+00 |

|                    |                |             |              |                                               |      |          |
|--------------------|----------------|-------------|--------------|-----------------------------------------------|------|----------|
| 27.                | VWPH01000020.1 | F1721_32680 | KAA5825911.1 | <i>cyp125</i>                                 | 4.35 | 1.22E-06 |
| 28.                | VWPH01000020.1 | F1721_32685 | KAA5825912.1 | <i>fadA5</i>                                  | 1.02 | 1.00E+00 |
| 29.                | VWPH01000020.1 | F1721_32690 | KAA5825913.1 | DUF4180<br>domain-containing protein          | 0.83 | 1.00E+00 |
| Ring A/B oxidation |                |             |              |                                               |      |          |
| 30.                | VWPH01000020.1 | F1721_32695 | KAA5825938.1 | helix-turn-helix<br>domain-containing protein | 1.02 | 1.00E+00 |
| 31.                | VWPH01000020.1 | F1721_32700 | KAA5825914.1 | <i>hsaB</i>                                   | 0.98 | 1.00E+00 |
| 32.                | VWPH01000020.1 | F1721_32705 | KAA5825915.1 | <i>hsaC</i>                                   | 1.22 | 1.00E+00 |
| 33.                | VWPH01000020.1 | F1721_32710 | KAA5825916.1 | <i>hsaD</i>                                   | 1.15 | 1.00E+00 |
| 34.                | VWPH01000020.1 | F1721_32715 | KAA5825917.1 | <i>hsaA</i>                                   | 1.23 | 1.00E+00 |
| 35.                | VWPH01000020.1 | F1721_32720 | KAA5825918.1 | <i>hsaF</i>                                   | 1.07 | 1.00E+00 |
| 36.                | VWPH01000020.1 | F1721_32725 | KAA5825919.1 | <i>hsaG</i>                                   | 1.30 | 1.00E+00 |
| 37.                | VWPH01000020.1 | F1721_32730 | KAA5825920.1 | <i>hsaE</i>                                   | 0.85 | 1.00E+00 |
| 38.                | VWPH01000020.1 | F1721_32735 | KAA5825921.1 | <i>kstD4</i>                                  | 1.27 | 1.00E+00 |
| 39.                | VWPH01000020.1 | F1721_32740 | KAA5825922.1 | <i>kstD3</i>                                  | 1.35 | 1.00E+00 |
| 40.                | VWPH01000020.1 | F1721_32745 | KAA5825923.1 | <i>kshA</i>                                   | 1.62 | 1.00E+00 |



|                      |                |             |              |                                        |      |          |
|----------------------|----------------|-------------|--------------|----------------------------------------|------|----------|
| 54.                  | VWPH01000024.1 | F1721_33670 | KAA5825025.1 | <i>kstR</i>                            | 1.57 | 5.72E-01 |
| Ring C/D degradation |                |             |              |                                        |      |          |
| 55.                  | VWPH01000024.1 | F1721_33675 | KAA5825026.1 | MBL fold<br>metallo-hydrolase          | 0.99 | 1.00E+00 |
| 56.                  | VWPH01000024.1 | F1721_33680 | KAA5825027.1 | SDR family<br>oxidoreductase           | 1.08 | 1.00E+00 |
| 57.                  | VWPH01000024.1 | F1721_33685 | KAA5825028.1 | <i>echA20</i>                          | 0.96 | 1.00E+00 |
| 58.                  | VWPH01000024.1 | F1721_33690 | KAA5825029.1 | <i>ipdA</i>                            | 1.20 | 1.00E+00 |
| 59.                  | VWPH01000024.1 | F1721_33695 | KAA5825030.1 | <i>ipdB</i>                            | 1.42 | 1.00E+00 |
| 60.                  | VWPH01000024.1 | F1721_33700 | KAA5825038.1 | <i>ipdC</i>                            | 0.96 | 1.00E+00 |
| 61.                  | VWPH01000024.1 | F1721_33705 | KAA5825039.1 | <i>kstR2</i>                           | 1.09 | 1.00E+00 |
| 62.                  | VWPH01000024.1 | F1721_33710 | KAA5825031.1 | <i>ipdF</i>                            | 0.80 | 1.00E+00 |
| 63.                  | VWPH01000024.1 | F1721_33715 | KAA5825032.1 | <i>fadE30</i>                          | 0.97 | 1.00E+00 |
| 64.                  | VWPH01000024.1 | F1721_33720 | KAA5825033.1 | <i>echA13</i> ,<br>enoyl-CoA hydratase | 1.24 | 1.00E+00 |
| 65.                  | VWPH01000024.1 | F1721_33725 | KAA5825040.1 | <i>fadE31</i>                          | 0.99 | 1.00E+00 |
| 66.                  | VWPH01000024.1 | F1721_33730 | KAA5825034.1 | <i>fadE32</i>                          | 0.74 | 1.00E+00 |
| 67.                  | VWPH01000024.1 | F1721_33735 | KAA5825035.1 | <i>fadE33</i>                          | 0.91 | 1.00E+00 |

| Cholate degradation pathway |                |             |              |                                                  |      |          |
|-----------------------------|----------------|-------------|--------------|--------------------------------------------------|------|----------|
| 68.                         | VWPH01000001.1 | F1721_00675 | KAA5838019.1 | <i>hsaE3</i>                                     | 0.82 | 1.00E+00 |
| 69.                         | VWPH01000001.1 | F1721_00680 | KAA5838020.1 | <i>hsaG3</i>                                     | 0.95 | 1.00E+00 |
| 70.                         | VWPH01000001.1 | F1721_00685 | KAA5838021.1 | <i>hsaF3</i>                                     | 0.85 | 1.00E+00 |
| 71.                         | VWPH01000001.1 | F1721_00690 | KAA5838022.1 | <i>casA</i>                                      | 0.85 | 1.00E+00 |
| 72.                         | VWPH01000001.1 | F1721_00695 | KAA5838023.1 | <i>hsaD3</i>                                     | 1.57 | 9.85E-01 |
| 73.                         | VWPH01000001.1 | F1721_00700 | KAA5838439.1 | <i>kstR3</i>                                     | 0.90 | 1.00E+00 |
| 74.                         | VWPH01000001.1 | F1721_00705 | KAA5838024.1 | SDR family<br>NAD(P)-dependent<br>oxidoreductase | 1.4  | 1.00E+00 |
| 75.                         | VWPH01000001.1 | F1721_00710 | KAA5838025.1 | <i>kstD2</i>                                     | 0.71 | 1.00E+00 |
| 76.                         | VWPH01000001.1 | F1721_00715 | KAA5838026.1 | <i>kstD1</i>                                     | 0.74 | 1.00E+00 |
| 77.                         | VWPH01000001.1 | F1721_00720 | KAA5838027.1 | SDR family<br>oxidoreductase                     | 0.83 | 1.00E+00 |
| 78.                         | VWPH01000001.1 | F1721_00725 | KAA5838028.1 | <i>kshA</i>                                      | 0.60 | 1.00E+00 |
| 79.                         | VWPH01000001.1 | F1721_00730 | KAA5838029.1 | hypothetical protein                             | 0.66 | 1.00E+00 |
| 80.                         | VWPH01000001.1 | F1721_00735 | KAA5838030.1 | <i>kshB</i>                                      | 0.58 | 1.00E+00 |
| 81.                         | VWPH01000001.1 | F1721_00740 | KAA5838031.1 | <i>ksdI</i>                                      | 1.17 | 1.00E+00 |

|                    |                |             |              |                                            |      |          |
|--------------------|----------------|-------------|--------------|--------------------------------------------|------|----------|
| 82.                | VWPH01000001.1 | F1721_00745 | KAA5838032.1 | <i>hsaB3</i>                               | 0.74 | 1.00E+00 |
| 83.                | VWPH01000001.1 | F1721_00750 | KAA5838440.1 | SDR family<br>oxidoreductase               | 0.94 | 1.00E+00 |
| 84.                | VWPH01000001.1 | F1721_00755 | KAA5838033.1 | <i>hsaA3</i>                               | 0.91 | 1.00E+00 |
| 85.                | VWPH01000001.1 | F1721_00760 | KAA5838034.1 | <i>hsaC3</i>                               | 0.82 | 1.00E+00 |
| 86.                | VWPH01000015.1 | F1721_28740 | KAA5828429.1 | class I SAM-dependent<br>methyltransferase | 1.03 | 1.00E+00 |
| 87.                | VWPH01000015.1 | F1721_28745 | KAA5828430.1 | <i>casA</i>                                | 0.91 | 1.00E+00 |
| 88.                | VWPH01000015.1 | F1721_28750 | KAA5828431.1 | <i>casC/chsE3</i>                          | 1.28 | 1.00E+00 |
| 89.                | VWPH01000015.1 | F1721_28755 | KAA5828432.1 | <i>casE</i>                                | 1.10 | 1.00E+00 |
| 90.                | VWPH01000015.1 | F1721_28760 | KAA5828433.1 | <i>3<math>\alpha</math>-hsd</i>            | 1.15 | 1.00E+00 |
| 91.                | VWPH01000015.1 | F1721_28765 | KAA5828434.1 | <i>casH</i>                                | 1.32 | 1.00E+00 |
| 92.                | VWPH01000015.1 | F1721_28770 | KAA5828435.1 | <i>casI</i>                                | 2.24 | 1.00E+00 |
| 93.                | VWPH01000001.1 | F1721_02365 | KAA5838304.1 | <i>casE</i>                                | 0.75 | 1.00E+00 |
| 94.                | VWPH01000001.1 | F1721_02405 | KAA5838310.1 | <i>casG</i>                                | 0.76 | 1.00E+00 |
| HIP-CoA synthetase |                |             |              |                                            |      |          |
| 95.                | VWPH01000019.1 | F1721_32060 | KAA5826116.1 | <i>fadD3</i>                               | 0.76 | 1.00E+00 |



|                           |                |             |              |              |      |          |
|---------------------------|----------------|-------------|--------------|--------------|------|----------|
| Thiolase                  |                |             |              |              |      |          |
| 96.                       | VWPH01000031.1 | F1721_34155 | KAA5824600.1 | <i>fadA6</i> | 0.94 | 1.00E+00 |
| Cholesterol oxidases      |                |             |              |              |      |          |
| 97.                       | VWPH01000006.1 | F1721_14655 | KAA5833518.1 | <i>choD</i>  | 0.73 | 1.00E+00 |
| 98.                       | VWPH01000004.1 | F1721_09795 | KAA5835081.1 | <i>choE</i>  | 0.89 | 1.00E+00 |
| Transcriptional regulator |                |             |              |              |      |          |
| 99.                       | VWPH01000015.1 | F1721_28735 | KAA5828487.1 | <i>kstR3</i> | 0.98 | 1.00E+00 |
